# Supplementary material for: FTO Positively Regulates Odontoblastic Differentiation via SMOC2 in Human Stem Cells from the Apical Papilla under Inflammatory Microenvironment
Source: MDPI journal article supplement (doi:10.3390/ijms25074045), 2024-04-05
Supplement: s1 [file s1]

# FTO Positively Regulates Odontoblastic Differentiation via SMOC2 in Human Stem Cells from the Apical Papilla under Inflammatory Microenvironment

Qi Huang <sup>1,2,3,†</sup>, Yumei Sun <sup>1,2,3,†</sup>, Wushuang Huang <sup>1,2,3</sup>, Fuping Zhang <sup>1,2,3</sup>, Hongwen He <sup>1,2,3</sup>, Yifan He <sup>1,2,3,\*</sup> and Fang Huang <sup>1,2,3,\*</sup>

<sup>1</sup> Hospital of Stomatology, Sun Yat-sen University, Guangzhou 510055, China;

huangq257@mail2.sysu.edu.cn (Q.H.); 13667453885@163.com (Y.S.); huangwsh26@mail.sysu.edu.cn (W.H.); zhangfp6@mail.sysu.edu.cn (F.Z.); hehw@mail.sysu.edu.cn (H.H.)

<sup>2</sup> Guangdong Provincial Key Laboratory of Stomatology, Guangzhou 510055, China

<sup>3</sup> Guanghua School of Stomatology, Sun Yat-sen University, Guangzhou 510055, China

\* Correspondence: heyifan@mail2.sysu.edu.cn (Y.H.); hfang@mail.sysu.edu.cn (F.H.)

† These authors contributed equally to this work.

## Supplementary Tables

**Table S1.** The target sequences for siRNA.

|           | sequences (5' to 3')   |
|-----------|------------------------|
| siFTO-1   | GGACCUUGGUAGGAUCCAATT  |
| siFTO-2   | GCAGCAUACAACGUAACUUTT  |
| siFTO-3   | GGAUGACUCUCAUUCUCGAATT |
| siSMOC2-1 | GCAAGUGUUCAUUCUGAGTT   |
| siSMOC2-2 | GAAGAUAUUGCAUCACGUUTT  |
| siSMOC2-3 | GCAGCCCAAGAACGACAAUTT  |
| siNC      | UUCUCCGAACGUGUCACGUTT  |

**Table S2.** qRT-PCR primers.

| Gene          | Forward primer           | Reverse primer           |
|---------------|--------------------------|--------------------------|
| GAPDH         | TCTCCTCTGACTTCAACAGCGACA | CCCTGTTGCTGTAGCCAAATTCGT |
| IL-1 $\beta$  | ATGATGGCTTATTACAGTGGCAA  | GTCGGAGATTTCGTAGCTGGA    |
| IL-6          | ACTCACCTCTTCAGAACGAATTG  | CCATCTTTGGAAGGTTTCAGGTTG |
| TNF- $\alpha$ | GAGGCCAAGCCCTGGTATG      | CGGGCCGATTGATCTCAGC      |
| FTO           | TGATCTCAATGCCACCCACC     | CAGAGCCAACTGACAGCGTT     |
| DSPP          | AAAGTGGTGTCTGGTGCAT      | CCTGGATGCCATTTGCTGTG     |
| DMP1          | CAGGAAGAGGTGGTGAGTGAGT   | TGGATTGCTGTCTGCTTGCT     |
| COL1          | AAAAGGAAGCTTGGTCCACT     | GTGTGGAGAAAGGAGCAGAA     |
| SMOC2         | TTCTCGGCGCTCACGTTTTT     | GTTGAAATTCACAACGGGAAAGG  |
